# Supplementary material for: The Mitotic Exit Network Regulates Spindle Pole Body Selection During Sporulation of Saccharomyces cerevisiae
Source: Oxford University Press journal article supplement (doi:10.1534/genetics.116.194522), 2017-04-28
Supplement: files1.doc [file files1.doc]

**S2 Table –** Yeast strains used in this study.

| **Strain** | **Relevant genotype** | **Source** |
| --- | --- | --- |
| YKS32 | *MAT****a***/*MATα lys2*/*lys2 ura3*/*ura3 ho*::*hisG*/*ho*::*LYS2 LEU2*/*leu2*::*hisG* | [1] |
| LH177 | *MAT***a**/*MAT*α *his3*/*his3 ura3*/*ura3 leu2*/*leu2 trp1*/*trp1 lys2*/*lys2 ho*::*hisG*/*ho*::*hisG* | [2] |
| YAB12 | *MAT****a*** *lys2 ura3 ho*::*hisG MNN1*::P*YKL050C*-*RedStar*::*kanMX4* | A kind gift of M. Knop |
| YCT716 | YKS32 *MNN1*/*MNN1*::P*YKL050c*-*GFP*::*kanMX4* | [3] |
| YKS53 | YKS32 *DON1*-*GFP*::*kanMX4*/*DON1*-*GFP*::*kanMX4* | [1] |
| YCR77 | *MAT***a**/*MAT*α *his3*/*his3 ura3*/*ura3 leu2*/*leu2 trp1*/*trp1 lys2*/*lys2 ho*::*LYS2*/*ho*::*LYS2* | This work |
| YCR330 | *MAT****a***/*MATα lys2*/*lys2 ura3*/*ura3 ho*::*LYS2*/*ho*::*LYS2 leu2*::*hisG*/*leu2*::*hisG* | This work |
| YAL19 | YCR77 *TRP1*::P*HIS3*-*mCherry*-*TUB1*::*trp1* | This work |
| YAL47 | YAL19 *DBF2*-*yeGFP*::*KanMX4* | This work |
| YAL48 | YAL19 *DBF20*-*yeGFP*::*KanMX4* | This work |
| YCR329 | YKS32 *his3*::P*IME2*-*pTEV+*-T*DIT1*::*kanMX4*::*his3*/*his3*::P*IME2*-*pTEV+*-T*DIT1*::*kanMX4*::*his3 trp1*::P*IME2*-*pTEV+*-T*DIT1*::*kanMX4*::*trp1*/*t trp1*::P*IME2*-*pTEV+*-T*DIT1*::*kanMX4*::*trp1* | This work |
| YAA146 | YCR329 *leu2*/*leu2 ho*::*LYS2*/*ho*::*LYS2* | This work |
| YCR332 | YCR329 *natNT2*::*sid*-*CDC15*/*natNT2*::*sid*-*CDC15* | This work |
| YCR356 | YCR329 *MPC54*-*yeGFP*::*hphNT1*/*MPC54* | This work |
| YCR357 | YCR356 *natNT2*::*sid*-*CDC15*/*natNT2*::*sid*-*CDC15* | This work |
| YCR370 | YCR77 *MNN1*::P*YKL050C*-*RedStar*::*hphNT1*/*MNN1*::P*YKL050C*-*GFP*::*hphNT1* | This work |
| YCR575 | YAA146 *natNT2*::*sid*-*CDC15*/*natNT2*::*sid*-*CDC15* | This work |
| YCR358 | YCR332 *DON1*-*yeGFP*::*hphNT1*/*DON1* | This work |
| YCR333 | YCR329 *natNT2*::*sid*-*MOB1*/*natNT2*::*sid*-*MOB1* | This work |
| YCR359 | YCR329 *natNT2*::*sid*-*DBF2*/*natNT2*::*sid*-*DBF2* | This work |
| YCR344 | YCR329 *natNT2*::*sid*-*DBF20*/*natNT2*::*sid*-*DBF20* | This work |
| YCR363 | YCR329 *natNT2*::*sid*-*DBF2*/*natNT2*::*sid*-*DBF2 natNT2*::*sid*-*DBF20*/*natNT2*::*sid*-*DBF20* | This work |
| YCR447 | YCR329 *natNT2*::*sid*-*DBF2*/*natNT2*::*sid*-*DBF2 natNT2*::*sid*-*MOB1*/*natNT2*::*sid*-*MOB1* | This work |
| YCR450 | YCR329 *natNT2*::*sid*-*DBF20*/*natNT2*::*sid*-*DBF20 natNT2*::*sid*-*MOB1*/*natNT2*::*sid*-*MOB1* | This work |
| YCR446 | YCR329 *natNT2*::*sid*-*DBF2*/*natNT2*::*sid*-*DBF2 natNT2*::*sid*-*DBF20*/*natNT2*::*sid*-*DBF20 natNT2*::*sid*-*MOB1*/*natNT2*::*sid*-*MOB1* | This work |
| YCR481 | YAA146 *MNN1*::P*YKL050C*-*RedStar*::*hphNT1*/*MNN1*::P*YKL050C*::*GFP*::*hphNT1* | This work |
| YCR482 | YCR481 *natNT2*::*sid*-*MOB1*/*natNT2*::*sid*-*MOB1* | This work |
| YCR483 | YCR481 *natNT2*::*sid*-*DBF2*/*natNT2*::*sid*-*DBF2 natNT2*::*sid*-*DBF20*/*natNT2*::*sid*-*DBF20* | This work |
| YCR525 | YCR481 *natNT2*::*sid*-*DBF2*/*natNT2*::*sid*-*DBF2 natNT2*::*sid*-*DBF20*/*natNT2*::*sid*-*DBF20 natNT2*::*sid*-*MOB1*/*natNT2*::*sid*-*MOB1* | This work |
| YCR555 | YCR329 *MPC54*-*myCitrine*::*hphNT1*/*MPC54*  *SPC42*-*yotagRFP*-*T*::*spHIS3MX6*/*SPC42* | This work |
| YCR556 | YCR555 *natNT2*::*sid*-*MOB1*/*natNT2*::*sid*-*MOB1* | This work |
| YCR557 | YCR555 *natNT2*::*sid*-*DBF2*/*natNT2*::*sid*-*DBF2 natNT2*::*sid*-*DBF20*/*natNT2*::*sid*-*DBF20* | This work |
| YCR558 | YCR555 *natNT2*::*sid*-*DBF2*/*natNT2*::*sid*-*DBF2 natNT2*::*sid*-*DBF20*/*natNT2*::*sid*-*DBF20 natNT2*::*sid*-*MOB1*/*natNT2*::*sid*-*MOB1* | This work |
| YCR536 | YCR329 *DON1*-*yeGFP*::*hphNT1*/ *DON1*-*yeGFP*::*hphNT1* | This work |
| YCR537 | YCR536 *natNT2*::*sid*-*MOB1*/*natNT2*::*sid*-*MOB1* | This work |
| YCR538 | YCR536 *natNT2*::*sid*-*DBF2*/*natNT2*::*sid*-*DBF2 natNT2*::*sid*-*DBF20*/*natNT2*::*sid*-*DBF20* | This work |
| YCR539 | YCR536 *natNT2*::*sid*-*DBF2*/*natNT2*::*sid*-*DBF2 natNT2*::*sid*-*DBF20*/*natNT2*::*sid*-*DBF20 natNT2*::*sid*-*MOB1*/*natNT2*::*sid*-*MOB1* | This work |
| YCR688 | YCR536 *natNT2*::*sid*-*CDC15*/*natNT2*::*sid*-*CDC15* | This work |
| YCR484 | YCR77 *MPC54*/*MPC54*-*6HA*::*HIS3MX6* | This work |
| YCR540 | YCR329 *MPC54*/*MPC54*-*9MYC*::*hphNT1* | This work |
| YCR541 | YCR540 *natNT2*::*sid*-*CDC15*/*natNT2*::*sid*-*CDC15* | This work |
| YCR542 | YCR540 *natNT2*::*sid*-*MOB1*/*natNT2*::*sid*-*MOB1* | This work |
| YCR543 | YCR540 *natNT2*::*sid*-*DBF2*/*natNT2*::*sid*-*DBF2 natNT2*::*sid*-*DBF20*/*natNT2*::*sid*-*DBF20* | This work |
| YCR544 | YCR540 *natNT2*::*sid*-*DBF2*/*natNT2*::*sid*-*DBF2 natNT2*::*sid*-*DBF20*/*natNT2*::*sid*-*DBF20 natNT2*::*sid*-*MOB1*/*natNT2*::*sid*-*MOB1* | This work |
| YCR485 | YCR77 *MPC70*/*MPC70*-*6HA*::*HIS3MX6* | This work |
| YCR545 | YCR329 *MPC70*/*MPC70*-*9MYC*::*hphNT1* | This work |
| YCR546 | YCR545 *natNT2*::*sid*-*CDC15*/*natNT2*::*sid*-*CDC15* | This work |
| YCR547 | YCR545 *natNT2*::*sid*-*MOB1*/*natNT2*::*sid*-*MOB1* | This work |
| YCR548 | YCR545 *natNT2*::*sid*-*DBF2*/*natNT2*::*sid*-*DBF2 natNT2*::*sid*-*DBF20*/*natNT2*::*sid*-*DBF20* | This work |
| YCR549 | YCR545 *natNT2*::*sid*-*DBF2*/*natNT2*::*sid*-*DBF2 natNT2*::*sid*-*DBF20*/*natNT2*::*sid*-*DBF20 natNT2*::*sid*-*MOB1*/*natNT2*::*sid*-*MOB1* | This work |
| YCR486 | YCR77 *SPO74*/*SPO74*-*6HA*::*HIS3MX6* | This work |
| YCR550 | YCR329 *SPO74*/*SPO74*-*9MYC*::*hphNT1* | This work |
| YCR551 | YCR550 *natNT2*::*sid*-*CDC15*/*natNT2*::*sid*-*CDC15* | This work |
| YCR552 | YCR550 *natNT2*::*sid*-*MOB1*/*natNT2*::*sid*-*MOB1* | This work |
| YCR553 | YCR550 *natNT2*::*sid*-*DBF2*/*natNT2*::*sid*-*DBF2 natNT2*::*sid*-*DBF20*/*natNT2*::*sid*-*DBF20* | This work |
| YCR554 | YCR550 *natNT2*::*sid*-*DBF2*/*natNT2*::*sid*-*DBF2 natNT2*::*sid*-*DBF20*/*natNT2*::*sid*-*DBF20 natNT2*::*sid*-*MOB1*/*natNT2*::*sid*-*MOB1* | This work |
| YCR606 | YCR77 *NUD1*/*NUD1*-*6HA*::*HIS3MX6* | This work |
| YCR607 | YCR329 *NUD1*/*NUD1*-*9MYC*::*hphNT1* | This work |
| YCR608 | YCR607 *natNT2*::*sid*-*CDC15*/*natNT2*::*sid*-*CDC15* | This work |
| YCR609 | YCR607 *natNT2*::*sid*-*MOB1*/*natNT2*::*sid*-*MOB1* | This work |
| YCR610 | YCR607 *natNT2*::*sid*-*DBF2*/*natNT2*::*sid*-*DBF2 natNT2*::*sid*-*DBF20*/*natNT2*::*sid*-*DBF20* | This work |
| YCR611 | YCR607 *natNT2*::*sid*-*DBF2*/*natNT2*::*sid*-*DBF2 natNT2*::*sid*-*DBF20*/*natNT2*::*sid*-*DBF20 natNT2*::*sid*-*MOB1*/*natNT2*::*sid*-*MOB1* | This work |
| YCR612 | YCR77 *CNM67*/*CNM67*-*6HA*::*HIS3MX6* | This work |
| YCR613 | YCR329 *CNM67*/*CNM67*-*9MYC*::*hphNT1* | This work |
| YCR614 | YCR613 *natNT2*::*sid*-*CDC15*/*natNT2*::*sid*-*CDC15* | This work |
| YCR615 | YCR613 *natNT2*::*sid*-*MOB1*/*natNT2*::*sid*-*MOB1* | This work |
| YCR616 | YCR613 *natNT2*::*sid*-*DBF2*/*natNT2*::*sid*-*DBF2 natNT2*::*sid*-*DBF20*/*natNT2*::*sid*-*DBF20* | This work |
| YCR617 | YCR613 *natNT2*::*sid*-*DBF2*/*natNT2*::*sid*-*DBF2 natNT2*::*sid*-*DBF20*/*natNT2*::*sid*-*DBF20 natNT2*::*sid*-*MOB1*/*natNT2*::*sid*-*MOB1* | This work |
| YAA9 | YKS32 *SPC42*-*tdTomato*::*hphNT1*/*SPC42*-*tdTomato*::*hphNT1* *BIK1*/*BIK1*-*4yeGFP*::*KanMX6* |  |
| YCR686 | YCR481 *natNT2*::*sid*-*KIN4*/*natNT2*::*sid*-*KIN4* | This work |
| YCR689 | YAA146 *MPC54*-*myCitrine*::*hphNT1*/*MPC54*  *SPC42*-*yotagRFP*-*T*::*spHIS3MX6*/*SPC42* | This work |
| YCR690 | YCR689 *natNT2*::*sid*-*CDC15*/*natNT2*::*sid*-*CDC15* | This work |
| YCR699 | YCR481 *natNT2*::*sid*-*NUD1*/*natNT2*::*sid*-*NUD1* | This work |
| YAA187 | YAA146 *natNT2*::*sid*-*CNM67*/*natNT2*::*sid*-*CNM67* | This work |
| YAA216 | YAA146 *natNT2*::*sid*-*NUD1*/*natNT2*::*sid*-*NUD1* | This work |
| YAA215 | YAA146 *natNT2*::*sid*-*KIN4*/*natNT2*::*sid*-*KIN4* | This work |
| YAA249 | YCR330 *DON1*-*3mTurquoise2*::*KanMX4*/*DON1*  *SPC42*-*yotagRFP*-*T*::*KanMX4*/*SPC42* | This work |
| YAA250 | YAA249 *KIN4*-*yomNeonGreen*::*NatNT2*/*KIN4* | This work |
| YCR414 | YCR330 *SPC42*-*dsRED::kanMX*/*SPC42-dsRED::kanMX SPC110-CFP::hphNT1/ SPC110-CFP::hphNT1 SPC72-YFP::natNT2*/*SPC72-YFP::natNT2* | This work |
| YCR459 | YKS32 *SPC42*-*dsRED::kanMX*/*SPC42-dsRED::kanMX MPC70-CFP::hphNT1/ MPC70-CFP::hphNT1 SPC72-YFP::natNT2*/*SPC72-YFP::natNT2* | This work |
| YCT1381 | YCR329 *natNT2*::*sid*-*CDC15*/*natNT2*::*sid*-*CDC15 HTB2-3mCherry::natNT2/HTB2-3mCherry::natNT2* | This work |
| YDS419 | YCR329 *SPC72-9myc::hphNT1/SPC72* | This work |
| YDS418 | YDS419 *natNT2*::*sid*-*CDC15*/*natNT2*::*sid*-*CDC15* | This work |
| YDS420 | YDS419 *natNT2*::*sid*-*DBF2*/*natNT2*::*sid*-*DBF2 natNT2*::*sid*-*DBF20*/*natNT2*::*sid*-*DBF20 natNT2*::*sid*-*MOB1*/*natNT2*::*sid*-*MOB1* | This work |
| YDS417 | YCR329 *SPC72-tagRFP-T::hphNT1/SPC72* | This work |
| YDS416 | YDS417 *natNT2*::*sid*-*CDC15*/*natNT2*::*sid*-*CDC15* | This work |
| YDS427 | YDS417 *natNT2*::*sid*-*DBF2*/*natNT2*::*sid*-*DBF2 natNT2*::*sid*-*DBF20*/*natNT2*::*sid*-*DBF20 natNT2*::*sid*-*MOB1*/*natNT2*::*sid*-*MOB1* | This work |
| YDS328 | YAA146 *natNT2*::*sid*-*SPC72*/*natNT2*::*sid*-*SPC72* | This work |

**S2 Table References**

1. Knop M, Strasser K (2000) Role of the spindle pole body of yeast in mediating assembly of the prospore membrane during meiosis. EMBO J 19: 3657–3667. doi:10.1093/emboj/19.14.3657.

2. Huang LS, Doherty HK, Herskowitz I (2005) The Smk1p MAP kinase negatively regulates Gsc2p, a 1,3-beta-glucan synthase, during spore wall morphogenesis in Saccharomyces cerevisiae. Proc Natl Acad Sci U S A 102: 12431–12436. doi:10.1073/pnas.0502324102.

3. Gordon O, Taxis C, Keller PJ, Benjak A, Stelzer EHK, et al. (2006) Nud1p, the yeast homolog of Centriolin, regulates spindle pole body inheritance in meiosis. EMBO J 25: 3856–3868. doi:10.1038/sj.emboj.7601254.

**S3** Table – Plasmids used in this study.

| **Plasmid** | **Relevant genotype** | **Source** |
| --- | --- | --- |
| pRS315 | *OriR bla CEN6*/*ARS209 LEU2* | [1] |
| pRS426 | *OriR bla 2µm URA3* | [2] |
| pFA6a-kanMX4 | *OriR bla KanMX4* | [3] |
| pFA6a-hphNT1 | *OriR bla hphNT1* | [4] |
| pFA6a-NatNT2 | *OriR bla NatNT2* | [4] |
| pYM12 | *OriR bla yeGFP*∷*KanMX4* | [4] |
| pYM15 | *OriR bla 6HA*∷*HIS3MX6* | [4] |
| pYM20 | *OriR bla 9MYC*∷*hphNT1* | [4] |
| pYM25 | *OriR bla yeGFP*∷*hphNT1* | [4] |
| pCM29 | *OriR bla* *myCitrine*∷*SpHIS5* | [5] |
| pCM49 | *OriR bla* *tdTomato*::*hphNT1* | [6] |
| pSM1023 | *OriR bla* *4yeGFP*::*kanMX6* | [7] |
| pAK010 | *OriR bla TRP1* P*HIS3*-*mCherry*-*TUB1* | [8] |
| pMJ11 | *OriR bla ura3*::P*IME2*-*pTEV+*-T*CYC1*::*kanMX*::*ura3* | [9] |
| pCT289 | *OriR bla natNT2*::P*ADH1*::*GFP*-*TDegF*-*3HA* | [10] |
| pDS37 | *OriR bla 2µm URA3* P*IME2*-*GFP*-*pTEV+*-T*CYC1* | [9] |
| pDS89 | *OriR bla CEN6*/*ARS209 LEU2* P*ADH1*-*3MYC*-*psd* | [11] |
| pCR6 | *OriR bla CEN6*/*ARS209 hphNT1* P*SPO74*::*GFP*-*pTEV+* | This work |
| pCR65 | *OriR bla natNT2*::P*MCD1*-*GFP*-*TDegF*-*3HA* | This work |
| pCR81 | *OriR bla 2µm URA3* P*IME2*-*pTEV+*-T*DIT1* | This work |
| pCR87 | *OriR bla yomTagRFP*-*T*::*KanMX4* | This work |
| pCR93 | *OriR bla 3mTurquoise2*::*KanMX4* | This work |
| pCR95 | *OriR bla yomNeonGreen∷NatNT2* | This work |
| pCR107 | *OriR bla ura3*::P*IME2*-*pTEV+*-T*DIT1*::*kanMX*::*ura3* | This work |
| pCR118 | *OriR bla LEU2* P*SPO74*-*CDC151*-*2250*-*3MYC*-*psdE139N* | This work |
| pCR122 | *OriR bla myCitrine*::*hphNT1* | This work |
| pCR124 | *OriR bla yomTagRFP*-*T*::*spHIS5* | This work |
| pCR126 | *OriR bla yomTagRFP*-*T*::*hphNT1* | This work |

**S3 Table References**

1. Sikorski RS, Hieter P (1989) A system of shuttle vectors and yeast host strains designed for efficient manipulation of DNA in Saccharomyces cerevisiae. Genetics 122: 19–27.

2. Christianson TW, Sikorski RS, Dante M, Shero JH, Hieter P (1992) Multifunctional yeast high-copy-number shuttle vectors. Gene 110: 119–122. doi:10.1016/0378-1119(92)90454-W.

3. Wach A, Brachat A, Pöhlmann R, Philippsen P (1994) New heterologous modules for classical or PCR-based gene disruptions in Saccharomyces cerevisiae. Yeast 10: 1793–1808.

4. Janke C, Magiera MM, Rathfelder N, Taxis C, Reber S, et al. (2004) A versatile toolbox for PCR-based tagging of yeast genes: new fluorescent proteins, more markers and promoter substitution cassettes. Yeast 21: 947–962. doi:10.1002/yea.1142.

5. van der Felden J, Weisser S, Bruckner S, Lenz P, Mosch H-U (2014) The Transcription Factors Tec1 and Ste12 Interact with Coregulators Msa1 and Msa2 To Activate Adhesion and Multicellular Development. Mol Cell Biol 34: 2283–2293. doi:10.1128/MCB.01599-13.

6. Maeder CI, Hink M a, Kinkhabwala A, Mayr R, Bastiaens PIH, et al. (2007) Spatial regulation of Fus3 MAP kinase activity through a reaction-diffusion mechanism in yeast pheromone signalling. Nat Cell Biol 9: 1319–1326. doi:10.1038/ncb1652.

7. Khmelinskii A, Lawrence C, Roostalu J, Schiebel E (2007) Cdc14-regulated midzone assembly controls anaphase B. J Cell Biol 177: 981–993. doi:10.1083/jcb.200702145.

8. Gibeaux R, Politi AZ, Nédélec F, Antony C, Knop M (2013) Spindle pole body-anchored Kar3 drives the nucleus along microtubules from another nucleus in preparation for nuclear fusion during yeast karyogamy. Genes Dev 27: 335–349. doi:10.1101/gad.206318.112.

9. Jungbluth M, Renicke C, Taxis C (2010) Targeted protein depletion in Saccharomyces cerevisiae by activation of a bidirectional degron. BMC Syst Biol 4: 176. doi:10.1186/1752-0509-4-176.

10. Taxis C, Stier G, Spadaccini R, Knop M (2009) Efficient protein depletion by genetically controlled deprotection of a dormant N-degron. Mol Syst Biol 5: 267. doi:10.1038/msb.2009.25.

11. Renicke C, Schuster D, Usherenko S, Essen L-O, Taxis C (2013) A LOV2 domain-based optogenetic tool to control protein degradation and cellular function. Chem Biol 20: 619–626. doi:10.1016/j.chembiol.2013.03.005.
