# Supplementary material for: The Mitotic Exit Network Regulates Spindle Pole Body Selection During Sporulation of Saccharomyces cerevisiae
Source: Oxford University Press journal article supplement (doi:10.1534/genetics.116.194522), 2017-04-28
Supplement: tables1.xls [file tables1.xls]

## Sheet: Figure 1D
Mutant	One Nucleus	Two or four Nuclei	No Nuclei	Monads	Dyads	Triads	Tetrads
Cdc15_Control	19 ± 3.9	3 ± 0.6	6 ± 2.2	1 ± 0.3	7 ± 0.5	21 ± 1.8	43 ± 4.6
Cdc15	24 ± 3.0	42 ± 3.9 ***	34 ± 5.2 ***	0 ± 0.1 **	0 ± 0.0 ***	0 ± 0.1 ***	0 ± 0.0 ***
Mean ± SEM; Significance levels (exact Wilcoxon-Mann-Whitney test): *: p<=0.05, **: p<=0.01, ***: p<=0.001

## Sheet: Figure 2A
Mutant	One Nucleus	Two or four Nuclei	No Nuclei	Monads	Dyads	Triads	Tetrads
Dbf2_Control	24 ± 2.6	4 ± 0.3	4 ± 1.1	1 ± 0.2	6 ± 0.7	20 ± 2.5	40 ± 3.5
Dbf2	24 ± 4.9	5 ± 1.0	4 ± 1.5	1 ± 0.3	6 ± 0.8	19 ± 3.0	42 ± 4.5
Dbf20_Control	27 ± 3.0	4 ± 0.4	4 ± 0.6	1 ± 0.3	7 ± 0.7	23 ± 2.4	35 ± 2.1
Dbf20	24 ± 5.6	4 ± 0.6	3 ± 0.6	4 ± 0.7 **	12 ± 1.4 *	27 ± 4.1	25 ± 2.0 **
Mob1_Control	19 ± 3.9	3 ± 0.6	6 ± 2.2	1 ± 0.3	7 ± 0.5	21 ± 1.8	43 ± 4.6
Mob1	26 ± 6.0	7 ± 1.3 **	7 ± 1.0	5 ± 1.3 ***	14 ± 1.9 **	22 ± 2.6	18 ± 3.9 **
Dbf2_Dbf20_Control	24 ± 3.2	4 ± 0.7	3 ± 0.7	1 ± 0.3	6 ± 0.8	20 ± 1.7	43 ± 5.0
Dbf2_Dbf20	25 ± 4.0	6 ± 1.1	4 ± 0.5 *	4 ± 0.6 **	12 ± 1.2 **	24 ± 1.6	24 ± 3.5 *
Dbf2_Mob1_Control	22 ± 2.6	3 ± 0.5	4 ± 0.7	1 ± 0.2	6 ± 0.6	24 ± 1.8	40 ± 3.0
Dbf2_Mob1	37 ± 4.0 **	9 ± 0.7 ***	7 ± 0.8 *	6 ± 0.7 ***	13 ± 1.4 **	18 ± 2.0 *	11 ± 0.7 ***
Dbf20_Mob1_Control	22 ± 2.6	3 ± 0.5	4 ± 0.7	1 ± 0.2	6 ± 0.6	24 ± 1.8	40 ± 3.0
Dbf20_Mob1	17 ± 2.7	7 ± 1.2 *	6 ± 0.8 *	10 ± 0.8 ***	21 ± 1.3 ***	27 ± 1.6	11 ± 0.8 ***
Dbf2_Dbf20_Mob1_Control	18 ± 3.1	2 ± 0.5	3 ± 0.6	1 ± 0.2	6 ± 0.5	23 ± 1.1	46 ± 3.8
Dbf2_Dbf20_Mob1	22 ± 3.1	5 ± 0.8 **	10 ± 3.3 **	12 ± 0.9 ***	20 ± 2.2 ***	21 ± 2.4	10 ± 1.2 ***
Mean ± SEM; Significance levels (exact Wilcoxon-Mann-Whitney test): *: p<=0.05, **: p<=0.01, ***: p<=0.001

## Sheet: Figure 2C
Mutant	One Nucleus	Two or four Nuclei	No Nuclei	Monads	Dyads	Triads	Tetrads
Kin4_Control	10 ± 1.0	2 ± 0.5	3 ± 0.6	1 ± 0.3	10 ± 1.5	26 ± 1.2	48 ± 1.9
Kin4	29 ± 2.5 ***	14 ± 1.6 ***	11 ± 1.5 ***	9 ± 1.3 ***	14 ± 1.3	12 ± 0.5 ***	11 ± 1.1 ***
Mean ± SEM; Significance levels (exact Wilcoxon-Mann-Whitney test): *: p<=0.05, **: p<=0.01, ***: p<=0.001

## Sheet: Figure 2E
Mutant	One Nucleus	Two or four Nuclei	No Nuclei	Monads	Dyads	Triads	Tetrads
Nud1_Control	13 ± 2.0	1 ± 0.3	2 ± 0.4	1 ± 0.2	9 ± 1.2	25 ± 1.2	47 ± 0.7
Nud1	21 ± 4.2	3 ± 0.6	3 ± 0.7	1 ± 0.3	2 ± 0.4 ***	9 ± 1.2 ***	62 ± 3.6 *
Mean ± SEM; Significance levels (exact Wilcoxon-Mann-Whitney test): *: p<=0.05, **: p<=0.01, ***: p<=0.001

## Sheet: Figure 5A
Mutant/Timepoint	No Signal	1 Signal	2 Signals	3 Signals	4 Signals	Refractive Spores
Control 6h	100 ± 0.1	0 ± 0.0	0 ± 0.0	0 ± 0.1	0 ± 0.1	0 ± 0.0
Control 7h	99 ± 0.6	0 ± 0.0	0 ± 0.0	1 ± 0.3	0 ± 0.3	0 ± 0.2
Control 8h	96 ± 0.7	0 ± 0.0	0 ± 0.1	2 ± 0.4	1 ± 0.2	1 ± 0.5
Control 9h	93 ± 0.7	0 ± 0.2	1 ± 0.2	2 ± 0.4	1 ± 0.1	2 ± 0.6
Control 10h	89 ± 1.6	0 ± 0.1	2 ± 0.4	4 ± 0.3	3 ± 1.6	2 ± 0.6
Control 11h	82 ± 2.7	1 ± 0.2	3 ± 0.8	7 ± 0.9	2 ± 0.4	5 ± 1.2
Control 12h	78 ± 2.6	0 ± 0.1	4 ± 0.5	6 ± 0.4	1 ± 0.5	11 ± 1.7
Control 13h	76 ± 3.3	1 ± 0.3	4 ± 0.5	4 ± 0.4	0 ± 0.1	15 ± 2.6
Control 14h	72 ± 3.1	0 ± 0.1	5 ± 0.3	2 ± 0.4	1 ± 0.1	20 ± 2.5
Control 15h	66 ± 2.6	0 ± 0.2	4 ± 0.5	3 ± 0.4	0 ± 0.1	27 ± 2.5
Cdc15 6h	100 ± 0.0	0 ± 0.0	0 ± 0.0	0 ± 0.0	0 ± 0.0	0 ± 0.0
Cdc15 7h	98 ± 0.4	0 ± 0.1	0 ± 0.1	0 ± 0.1	1 ± 0.4	0 ± 0.0
Cdc15 8h	94 ± 0.7 *	0 ± 0.1	0 ± 0.1	1 ± 0.2	5 ± 0.5 **	0 ± 0.0
Cdc15 9h	90 ± 0.6 *	0 ± 0.1	0 ± 0.2	1 ± 0.2	8 ± 0.4 **	0 ± 0.0 **
Cdc15 10h	83 ± 0.6 *	1 ± 0.2	1 ± 0.2 **	3 ± 0.2	11 ± 0.4 **	0 ± 0.1 *
Cdc15 11h	79 ± 1.0	1 ± 0.2	1 ± 0.4	6 ± 0.6	13 ± 1.3 **	0 ± 0.1 *
Cdc15 12h	80 ± 1.0	2 ± 0.4 **	2 ± 0.4	7 ± 1.0	9 ± 0.9 **	0 ± 0.1 **
Cdc15 13h	84 ± 0.8	2 ± 0.1 **	2 ± 0.3 *	5 ± 0.5 *	6 ± 0.7 **	0 ± 0.1 **
Cdc15 14h	84 ± 0.8 **	2 ± 0.5 *	2 ± 0.3 **	6 ± 0.6 **	5 ± 1.1 **	0 ± 0.1 *
Cdc15 15h	87 ± 0.5 **	2 ± 0.3 *	2 ± 0.2 **	5 ± 0.7	4 ± 0.8 *	0 ± 0.0 **
Mean ± SEM; Significance levels (exact Wilcoxon-Mann-Whitney test): *: p<=0.05, **: p<=0.01, ***: p<=0.001

## Sheet: Figure 5B
Mutant/Timepoint	No Signal	1 Signal	2 Signals	3 Signals	4 Signals	Refractive Spores
Control 6 h	94 ± 0.8	0 ± 0.1	0 ± 0.1	1 ± 0.3	1 ± 0.5	3 ± 0.3
Control 7 h	79 ± 2.2	2 ± 0.4	3 ± 0.6	9 ± 2.0	3 ± 0.8	5 ± 0.7
Control 8 h	62 ± 2.7	3 ± 0.3	10 ± 1.0	13 ± 1.4	2 ± 0.3	10 ± 1.6
Control 9 h	62 ± 3.5	3 ± 1.0	8 ± 0.9	6 ± 1.1	1 ± 0.2	20 ± 6.1
Control 10 h	60 ± 6.4	2 ± 0.6	5 ± 0.3	4 ± 0.5	0 ± 0.2	28 ± 6.0
Control 11 h	41 ± 2.0	1 ± 0.3	3 ± 0.6	2 ± 0.6	0 ± 0.1	52 ± 2.1
Control 12 h	39 ± 3.1	1 ± 0.5	4 ± 0.6	2 ± 0.6	0 ± 0.0	55 ± 3.0
Mob1 6 h	94 ± 1.3	0 ± 0.1	0 ± 0.1	1 ± 0.2	2 ± 0.9	2 ± 0.6
Mob1 7 h	80 ± 4.1	2 ± 0.5	3 ± 0.4	7 ± 1.5	5 ± 2.3	3 ± 0.4
Mob1 8 h	58 ± 4.5	2 ± 0.8	8 ± 1.2	14 ± 2.0	7 ± 2.2	11 ± 1.5
Mob1 9 h	60 ± 2.0	3 ± 1.1	8 ± 1.9	11 ± 0.5 *	4 ± 1.2 *	13 ± 1.3
Mob1 10 h	73 ± 2.7	2 ± 0.9	5 ± 1.1	8 ± 0.5 *	0 ± 0.1	12 ± 1.2 *
Mob1 11 h	71 ± 6.1 *	1 ± 0.5	3 ± 0.4	3 ± 0.6	0 ± 0.3	20 ± 6.6 *
Mob1 12 h	75 ± 3.7 *	2 ± 0.3	5 ± 1.2	2 ± 0.7	0 ± 0.2	17 ± 4.5 *
Dbf2 Dbf20 6 h	97 ± 0.8	0 ± 0.1	0 ± 0.2	1 ± 0.3	1 ± 0.4	2 ± 0.3 *
Dbf2 Dbf20 7 h	80 ± 2.4	2 ± 0.7	4 ± 1.2	7 ± 2.5	3 ± 1.0	5 ± 0.6
Dbf2 Dbf20 8 h	65 ± 3.9	3 ± 1.2	8 ± 1.2	13 ± 2.7	3 ± 1.4	8 ± 2.6
Dbf2 Dbf20 9 h	70 ± 2.3	3 ± 1.4	7 ± 1.2	9 ± 1.4	1 ± 0.5	8 ± 0.8
Dbf2 Dbf20 10 h	74 ± 2.0	3 ± 0.8	5 ± 0.9	5 ± 0.5	1 ± 0.2	12 ± 1.4 *
Dbf2 Dbf20 11 h	74 ± 2.3 *	2 ± 0.2	4 ± 0.7	2 ± 0.3	0 ± 0.0	18 ± 2.3 *
Dbf2 Dbf20 12 h	73 ± 2.3 *	2 ± 0.6	4 ± 0.5	2 ± 0.7	0 ± 0.1	19 ± 1.8 *
Dbf2 Dbf20 Mob1 6 h	95 ± 1.5	0 ± 0.5	0 ± 0.0	1 ± 0.4	1 ± 1.1	2 ± 0.5
Dbf2 Dbf20 Mob1 7 h	71 ± 5.2	3 ± 2.1	5 ± 0.6	13 ± 3.8	4 ± 1.8	4 ± 1.0
Dbf2 Dbf20 Mob1 8 h	60 ± 2.5	2 ± 0.9	10 ± 2.6	15 ± 0.9	2 ± 0.7	11 ± 6.2
Dbf2 Dbf20 Mob1 9 h	72 ± 2.3	1 ± 0.3	5 ± 1.4	9 ± 0.4	1 ± 0.8	12 ± 2.0
Dbf2 Dbf20 Mob1 10 h	76 ± 0.5	2 ± 0.4	4 ± 0.5	5 ± 0.8	0 ± 0.4	12 ± 0.8
Dbf2 Dbf20 Mob1 11 h	74 ± 2.1	2 ± 0.1	4 ± 1.4	2 ± 0.1	0 ± 0.2	18 ± 3.1
Dbf2 Dbf20 Mob1 12 h	75 ± 3.6	1 ± 0.7	5 ± 0.9	3 ± 0.8	0 ± 0.0	16 ± 2.8
Mean ± SEM; Significance levels (exact Wilcoxon-Mann-Whitney test): *: p<=0.05, **: p<=0.01, ***: p<=0.001
Significance not tested for Dbf2 Dbf20 Mob1 mutants (only 2 replicates)

## Sheet: Figure 7
Mutant/Timepoint	No signal	1 Signal	2 Signals	3 Signals	4 Signals	PSMs	Refractive Spores
Control 5 h	100 ± 0.0	0 ± 0.0	0 ± 0.0	0 ± 0.0	0 ± 0.0	0 ± 0.0	0 ± 0.0
Control 6 h	99 ± 0.2	0 ± 0.1	0 ± 0.0	0 ± 0.1	0 ± 0.3	0 ± 0.0	0 ± 0.0
Control 7 h	85 ± 6.6	1 ± 0.3	5 ± 2.5	6 ± 3.9	3 ± 1.0	0 ± 0.2	0 ± 0.0
Control 8 h	68 ± 7.9	1 ± 0.5	9 ± 4.8	13 ± 2.6	3 ± 0.9	5 ± 2.1	1 ± 0.5
Control 9 h	58 ± 2.7	1 ± 0.4	11 ± 0.5	10 ± 3.7	3 ± 1.3	15 ± 6.7	2 ± 0.7
Control 12 h	39 ± 6.6	2 ± 0.6	7 ± 1.0	2 ± 0.6	0 ± 0.2	23 ± 4.3	27 ± 5.3
Control 14 h	31 ± 2.6	2 ± 0.3	3 ± 0.7	1 ± 0.4	0 ± 0.1	5 ± 1.0	57 ± 3.8
Mob1 5 h	100 ± 0.2	0 ± 0.0	0 ± 0.0	0 ± 0.0	0 ± 0.2	0 ± 0.1	0 ± 0.0
Mob1 6 h	98 ± 0.4	0 ± 0.2	0 ± 0.1	0 ± 0.1	1 ± 0.3	0 ± 0.0	0 ± 0.0
Mob1 7 h	87 ± 1.2	1 ± 0.5	3 ± 0.7	5 ± 2.1	4 ± 1.4	0 ± 0.1	0 ± 0.0
Mob1 8 h	70 ± 4.5	1 ± 0.6	8 ± 3.6	11 ± 1.9	7 ± 2.8	3 ± 0.9	0 ± 0.0
Mob1 9 h	52 ± 1.0	1 ± 0.2	9 ± 0.2	15 ± 3.5	5 ± 2.3	15 ± 5.2	3 ± 0.8
Mob1 12 h	56 ± 2.0	2 ± 0.4	9 ± 2.3	3 ± 0.4	0 ± 0.1	22 ± 1.4	9 ± 1.6 *
Mob1 14 h	66 ± 0.5 *	2 ± 0.5	5 ± 0.9	1 ± 0.4	0 ± 0.2	4 ± 1.1	22 ± 1.3 *
Dbf2 Dbf20 5 h	100 ± 0.3	0 ± 0.0	0 ± 0.1	0 ± 0.0	0 ± 0.1	0 ± 0.0	0 ± 0.0
Dbf2 Dbf20 6 h	99 ± 0.3	0 ± 0.1	0 ± 0.2	0 ± 0.0	0 ± 0.2	0 ± 0.1	0 ± 0.0
Dbf2 Dbf20 7 h	87 ± 5.1	0 ± 0.2	5 ± 2.8	5 ± 2.7	1 ± 0.4	0 ± 0.3	0 ± 0.0
Dbf2 Dbf20 8 h	74 ± 7.3	1 ± 0.2	9 ± 3.8	8 ± 1.5	2 ± 1.0	6 ± 2.9	0 ± 0.2
Dbf2 Dbf20 9 h	57 ± 2.9	1 ± 0.2	11 ± 1.1	12 ± 3.4	1 ± 0.6	15 ± 6.4	2 ± 1.2
Dbf2 Dbf20 12 h	57 ± 2.3	2 ± 0.6	9 ± 0.6	2 ± 0.4	0 ± 0.0	21 ± 1.5	9 ± 1.5 *
Dbf2 Dbf20 14 h	67 ± 2.9 *	2 ± 0.1	6 ± 1.2	0 ± 0.1	0 ± 0.1	6 ± 1.0	19 ± 3.9 *
Dbf2 Dbf20 Mob1 5 h	100 ± 0.3	0 ± 0.0	0 ± 0.0	0 ± 0.1	0 ± 0.3	0 ± 0.0	0 ± 0.0
Dbf2 Dbf20 Mob1 6 h	99 ± 0.3	0 ± 0.1	0 ± 0.4	0 ± 0.0	0 ± 0.1	0 ± 0.0	0 ± 0.0
Dbf2 Dbf20 Mob1 7 h	87 ± 5.7	1 ± 0.9	5 ± 2.9	4 ± 2.0	3 ± 0.9	1 ± 0.2	0 ± 0.0
Dbf2 Dbf20 Mob1 8 h	68 ± 8.6	2 ± 1.0	9 ± 2.6	11 ± 2.4	3 ± 0.7	6 ± 3.4	0 ± 0.2
Dbf2 Dbf20 Mob1 9 h	59 ± 4.7	2 ± 0.4	13 ± 1.8	10 ± 3.7	2 ± 0.8	14 ± 5.1	1 ± 0.4
Dbf2 Dbf20 Mob1 12 h	54 ± 3.3	2 ± 0.7	7 ± 0.7	2 ± 0.3	0 ± 0.3	25 ± 1.9	9 ± 2.0 *
Dbf2 Dbf20 Mob1 14 h	71 ± 2.0 *	2 ± 0.2	5 ± 2.4	1 ± 0.3	0 ± 0.0 *	6 ± 0.7	14 ± 1.2 *
Mean ± SEM; Significance levels (exact Wilcoxon-Mann-Whitney test): *: p<=0.05, **: p<=0.01, ***: p<=0.001

## Sheet: Figure S6E
Mutant	One Nucleus	Two or four Nuclei	No Nuclei	Monads	Dyads	Triads	Tetrads
Cnm67_Control	30 ± 10.7	3 ± 0.8	2 ± 0.4	0 ± 0.3	5 ± 2.8	19 ± 6.2	40 ± 3.8
Cnm67	68 ± 4.7 *	22 ± 4.4 *	10 ± 1.6 *	0 ± 0.0	0 ± 0.0	0 ± 0.0 *	0 ± 0.0 *
Mean ± SEM; Significance levels (exact Wilcoxon-Mann-Whitney test): *: p<=0.05, **: p<=0.01, ***: p<=0.001

## Sheet: Figure S12D
Mutant	One or no Nuclei	Two or four Nuclei	Monads	Dyads	Triads	Tetrads
Spc72_Control	8 ± 1.9	1 ± 0.6	1 ± 0.4	14 ± 2.6	35 ± 3.3	41 ± 6.7
Spc72	16 ± 2.8	3 ± 1.0	1 ± 0.3	13 ± 1.6	31 ± 2.3	36 ± 3.8
Mean ± SEM; Significance levels (exact Wilcoxon-Mann-Whitney test): *: p<=0.05, **: p<=0.01, ***: p<=0.001

## Sheet: Figure S14B
	0 or 1 Nuclei	2 or 4 Nuclei	Monads	Dyads	Triads	Tetrads
negControl (wt)	15 ± 1.7	1 ± 0.3	5 ± 1.0	21 ± 0.8	34 ± 1.5	24 ± 2.6
Control (Cdc15Depl)	83 ± 2.1	16 ± 2.0	1 ± 0.1	0 ± 0.1	0 ± 0.1	0 ± 0.0
Cdc15Depl + Cdc15dC	30 ± 2.9 ***	7 ± 0.7 **	13 ± 2.2 ***	26 ± 1.3 ***	18 ± 2.7 ***	7 ± 1.8 **
Mean ± SEM; Significance levels (exact Wilcoxon-Mann-Whitney test against control): *: p<=0.05, **: p<=0.01, ***: p<=0.001

[truncated: 2 more sheets: Figure S14C, Figure S15]
